# Supplementary material for: The Nexus between Fire and Soil Bacterial Diversity in the African Miombo Woodlands of Niassa Special Reserve, Mozambique
Source: MDPI journal article supplement (doi:10.3390/microorganisms9081562), 2021-07-22
Supplement: s1 [file s1]

Figure S1

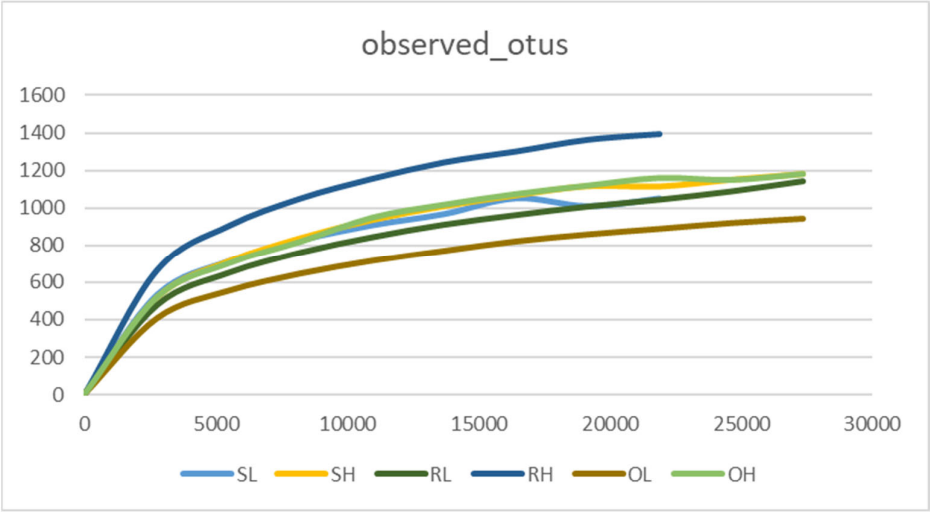

Figure S2

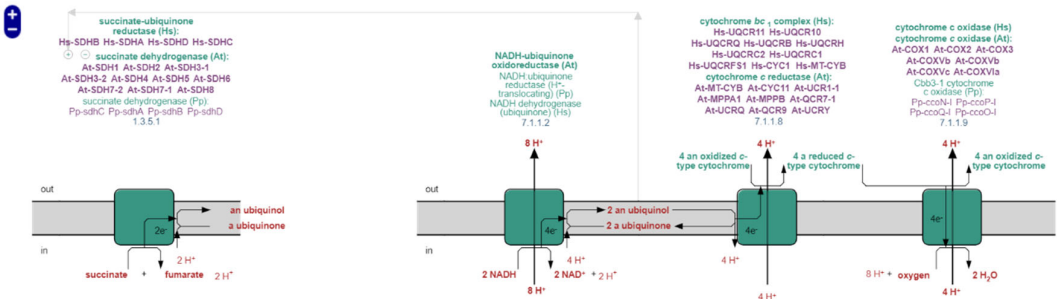

**Table 1.** Statistics of raw data of soil samples of Miombo woodlands. S: Brownish-gray sandy soils; R: Red soils of medium texture; O: Red soils with medium texture oxic. Soil type code followed by H indicates high fire frequency while L indicates low fire frequency.

| Soil type                          | Fire frequency | Code | Total Bases   | Read Count | N (%) | GC (%) | Q20 (%) | Q30 (%) |
|------------------------------------|----------------|------|---------------|------------|-------|--------|---------|---------|
| Brownish-gray sandy soils          | Low            | SL   | 434027445     | 959134     | 0     | 58     | 97      | 90      |
|                                    | High           | SH   | 409324077     | 908975     | 0     | 58     | 98      | 91      |
| Red soils of medium texture        | Low            | RL   | 404076937     | 889657     | 0     | 58     | 97      | 91      |
|                                    | High           | RH   | 417281764     | 923287     | 0     | 58     | 97      | 91      |
| Red soils with medium texture oxic | Low            | OL   | 422193616     | 931887     | 0     | 57     | 98      | 91      |
|                                    | High           | OH   | 370550641     | 816239     | 0     | 58     | 97      | 90      |
| Total                              |                |      | 2,457,454,480 | 5,429,179  |       | 57.83  |         |         |

**Table S2.** ANOVA results showing bacterial differences at the top Phyla between the type of soil (ST), the fire frequency (FI) and its interaction. Significant results are indicated in red.

| <b>Acidobacteria</b>  | <b>df</b> | <b>MS</b> | <b>F</b> | <b>P</b> |
|-----------------------|-----------|-----------|----------|----------|
| <b>ST</b>             | 2         | 35518794  | 7.6757   | 0.0038   |
| <b>FI</b>             | 1         | 994301    | 0.4297   | 0.0021   |
| <b>FI*ST</b>          | 2         | 1137523   | 0.2458   | 0.0541   |
| <b>Actinobacteria</b> |           |           |          |          |
| <b>ST</b>             | 2         | 1248980   | 0.7366   | 0.4926   |
| <b>FI</b>             | 1         | 1356880   | 9.4450   | 0.0065   |
| <b>FI*ST</b>          | 2         | 2323670   | 2.2848   | 0.1305   |
| <b>Proteobacteria</b> |           |           |          |          |
| <b>ST</b>             | 2         | 9197876   | 0.6693   | 0.5243   |
| <b>FI</b>             | 1         | 2801520   | 0.0407   | 0.8422   |
| <b>FI*ST</b>          | 2         | 19867546  | 1.4458   | 0.2616   |

**Table S3.** ANOVA results showing bacterial differences at the top Genus between the type of soil type (ST), the fire frequency (FI) and its interaction. Significant results are indicated in red.

| Effect                   | df | MS       | F       | P        |
|--------------------------|----|----------|---------|----------|
| <b>Chthoniobacter</b>    |    |          |         |          |
| ST                       | 2  | 20908415 | 18.1981 | 0.000048 |
| FI                       | 1  | 11972350 | 10.4204 | 0.004665 |
| FI*ST                    | 2  | 7043133  | 6.1301  | 0.009324 |
| <b>Gaiella</b>           |    |          |         |          |
| ST                       | 2  | 4414294  | 3.6423  | 0.046962 |
| FI                       | 1  | 3500648  | 4.8884  | 0.006211 |
| FI*ST                    | 2  | 1306593  | 5.0781  | 0.035100 |
| <b>Solirubrobacter</b>   |    |          |         |          |
| ST                       | 2  | 2084752  | 4.4237  | 0.027374 |
| FI                       | 1  | 2208873  | 4.6871  | 0.044073 |
| FI*ST                    | 2  | 2842036  | 6.0306  | 0.009895 |
| <b>Saccharopolyspora</b> |    |          |         |          |
| ST                       | 2  | 345600   | 5.1102  | 0.04500  |
| FI                       | 1  | 123669   | 2.9901  | 0.05671  |
| FI*ST                    | 2  | 234891   | 2.5619  | 0.05011  |
| <b>Bacillus</b>          |    |          |         |          |
| ST                       | 2  | 348810   | 5.6667  | 0.04021  |
| FI                       | 1  | 133488   | 4.6871  | 0.05022  |
| FI*ST                    | 2  | 230090   | 3.2252  | 0.00610  |

**Table S4.** Top 20 pathways detected by PICRUSt in miombo samples.

| Pathway                   | Description                                                  | SH       | SL       | RL       | RH       | OL       | OH       |
|---------------------------|--------------------------------------------------------------|----------|----------|----------|----------|----------|----------|
| PWY-3781                  | aerobic respiration I (cytochrome c)                         | 57957.63 | 82600.85 | 90537.08 | 64231.53 | 99601.01 | 73689.28 |
| PWY-7111                  | pyruvate fermentation to isobutanol (engineered)             | 34242.77 | 48153.65 | 51866.44 | 38762.56 | 56226.01 | 39516.54 |
| PWY-5101                  | L-isoleucine biosynthesis II                                 | 32572.09 | 43776.91 | 49126.74 | 37244.49 | 53291.43 | 39323.15 |
| ILEUSYN-PWY               | L-isoleucine biosynthesis I (from threonine)                 | 31887.65 | 43623.63 | 48314.61 | 36577.27 | 51098.10 | 37979.65 |
| VALSYN-PWY                | L-valine biosynthesis                                        | 31887.65 | 43623.63 | 48314.61 | 36577.27 | 51098.10 | 37979.65 |
| BRANCHED-CHAIN-AA-SYN-PWY | superpathway of branched amino acid biosynthesis             | 27460.04 | 36695.92 | 42277.82 | 31742.49 | 46132.10 | 34691.72 |
| PWY-7094                  | fatty acid salvage                                           | 26381.72 | 38646.21 | 47058.33 | 32104.45 | 39223.41 | 34424.06 |
| NONOXIPENT-PWY            | pentose phosphate pathway (non-oxidative branch)             | 25145.90 | 37994.14 | 40369.04 | 27045.89 | 40940.09 | 30867.38 |
| PWY-5103                  | L-isoleucine biosynthesis III                                | 24262.10 | 31682.54 | 36806.33 | 27598.97 | 41139.96 | 30443.07 |
| PWY-6969                  | TCA cycle V (2-oxoglutarate:ferredoxin oxidoreductase)       | 23998.91 | 32097.75 | 35752.97 | 26459.81 | 40560.07 | 29713.41 |
| FAO-PWY                   | fatty acid &beta;-oxidation I                                | 23696.00 | 34162.49 | 42286.14 | 29068.43 | 35961.48 | 31922.50 |
| TCA                       | TCA cycle I (prokaryotic)                                    | 23588.44 | 30655.76 | 34264.75 | 25731.96 | 40235.69 | 28952.61 |
| PHOSLIPSYN-PWY            | superpathway of phospholipid biosynthesis I (bacteria)       | 22891.44 | 32093.25 | 33956.38 | 25847.17 | 40609.38 | 30144.36 |
| PWY-5667                  | CDP-diacylglycerol biosynthesis I                            | 22573.70 | 31594.65 | 32149.99 | 24786.99 | 38860.26 | 28767.02 |
| PWY0-1319                 | CDP-diacylglycerol biosynthesis II                           | 22573.71 | 31594.64 | 32149.98 | 24786.97 | 38860.26 | 28767.01 |
| PWY-5973                  | cis-vaccenate biosynthesis                                   | 22280.09 | 26902.89 | 29110.97 | 25228.32 | 38502.77 | 27010.73 |
| PWY-5659                  | GDP-mannose biosynthesis                                     | 22063.24 | 29674.78 | 35581.39 | 26816.63 | 38277.11 | 30623.15 |
| PWY4FS-7                  | phosphatidylglycerol biosynthesis I (plastidic)              | 21786.33 | 30217.11 | 32346.94 | 24557.02 | 38485.80 | 28521.81 |
| PWY4FS-8                  | phosphatidylglycerol biosynthesis II (non-plastidic)         | 21786.33 | 30217.11 | 32346.94 | 24557.02 | 38485.80 | 28521.81 |
| PWY-7229                  | superpathway of adenosine nucleotides de novo biosynthesis I | 21697.02 | 30215.63 | 33022.91 | 24514.54 | 36879.97 | 27856.04 |

**Table S5.** Average dry weight (g) of *Vigna unguiculata* plants inoculated with different soil samples (mean  $\pm$  SD). S: Brownish-gray sandy; R: Red soils of medium texture; O: Red soils of medium texture oxid; SL: *Brachystegia* rhizosphere on S with low fire frequency; SH: *Brachystegia* rhizosphere on S with high fire frequency; RL: *Brachystegia* rhizosphere on R with low fire frequency; RH: *Brachystegia* rhizosphere on R with high fire frequency; OL: *Brachystegia* rhizosphere on O with low fire frequency; OH: *Brachystegia* rhizosphere on O with high fire frequency. Uninoculated plants were also included supplied either with nitrogen (TN) or without mineral N (T0). Values of shoot dry weight are the average of replicates/soil type. Es (%) was calculated as  $Es = (X_s - XT_0 / X_{TN} - XT_0) \times 100$ , where  $X_s$  represents the mean dry weight of inoculated shoots  $\pm$  SD;  $X_{TN}$  the mean dry weight of plants with nitrogen control;  $XT_0$  the mean dry weight of uninoculated plants.

| Soil Type   | Fire      |      | Replicate 1 | Replicate 2 | Replicate 3 | Replicate 4 | Replicate 5 | Average | Symbiotic % |
|-------------|-----------|------|-------------|-------------|-------------|-------------|-------------|---------|-------------|
|             | Frequency | Code |             |             |             |             |             |         |             |
| Sandy soils | Low       | SL   | 0.21        | 0.31        | 0.13        | 0.37        | 0.23        | 0.25    | 189.84      |
|             | High      | SH   | 0.09        | 0.06        | 0.14        | 0.17        | 0.16        | 0.124   | 42.18       |
| Red soils   | Low       | RL   | 0.41        | 0.16        | 0.09        | 0.09        | 0.21        | 0.192   | 121.87      |
|             | High      | RH   | 0.20        | 0.31        | 0.13        | 0.37        | 0.23        | 0.248   | 187.50      |
| Oxi-soils   | Low       | OL   | 0.42        | 0.33        | 0.05        | 0.36        |             | 0.290   | 236.71      |
|             | High      | OH   | 0.33        | 0.26        | 0.08        | 0.10        | 0.31        | 0.216   | 150.00      |

**Table S6.** Taxonomical identification of isolates from *Vigna unguiculata* root nodules inoculated with NSR soil samples and related phylum according to the most related source organism deposited in GenBank. Population codes follow Figure 1. GenBank accession numbers indicate the sequences generated in this study.

| Soil type   | Fire frequency | Isolate | Most related 16S rRNA gene sequence(s)                 | Phylum         | GenBank accession number | % Identity |
|-------------|----------------|---------|--------------------------------------------------------|----------------|--------------------------|------------|
| Sandy soils | Low            | SL3     | <i>Rhizobium</i> sp. strain LrSB2                      | Proteobacteria | MZ575037                 | 98.09%     |
|             |                | SL4     | <i>Cohnella</i> sp. KS7                                | Firmicutes     | MZ575038                 | 88.77%     |
|             |                | SL6     | Uncultured bacterium clone PL11D04                     |                | MZ575039                 | 92.44%     |
|             |                | SL9B    | <i>Mesorhizobium</i> sp. OA245                         | Proteobacteria | MZ575040                 | 96.27%     |
|             |                | SL9C    | <i>Agrobacterium</i> sp. strain AgSP1                  | Proteobacteria | MZ575041                 | 93.75%     |
|             |                | SL10AB  | <i>Stenotrophomonas</i> sp. YAZ112                     | Proteobacteria | MZ575042                 | 95.59%     |
|             |                | SL10AC  | <i>Stenotrophomonas maltophilia</i> strain NRB225      | Proteobacteria | MZ575043                 | 85.60%     |
|             |                | SL11A   | Bacterium strain BS1066                                |                | MZ575044                 | 85.24%     |
|             |                | SH1     | <i>Xanthomonas oryzae</i> pv. <i>oryzae</i> strain MTU | Proteobacteria | MZ575045                 | 97.14%     |
|             |                | SH3A    | <i>Herbaspirillum huttiense</i> Sal 36                 | Proteobacteria | MZ575046                 | 96.39%     |
|             | High           | SH5A    | <i>Pseudomonas</i> sp. strain S-1                      | Proteobacteria | MZ575047                 | 92.63%     |
|             |                | SH8     | <i>Xanthomonas oryzae</i> pv. <i>oryzae</i> strain KRG | Proteobacteria | MZ575048                 | 97.14%     |
|             |                |         |                                                        |                |                          |            |
|             |                |         |                                                        |                |                          |            |
|             |                |         |                                                        |                |                          |            |
|             |                |         |                                                        |                |                          |            |
|             |                |         |                                                        |                |                          |            |
|             |                |         |                                                        |                |                          |            |
|             |                |         |                                                        |                |                          |            |
|             |                |         |                                                        |                |                          |            |
| Red soils   | Low            | RL4A    | <i>Agrobacterium fabrum</i> strain C58                 | Proteobacteria | MZ575008                 | 99.80%     |
|             |                | RL5A    | <i>Variovorax guangxiensis</i> strain GXGD002          | Proteobacteria | MZ575009                 | 93.39%     |
|             |                | RL5B    | <i>Agrobacterium salinitolerans</i> strain YIC 5082    | Proteobacteria | MZ575010                 | 91.13%     |
|             |                | RL6A    | <i>Stenotrophomonas maltophilia</i> strain IAM 12423   | Proteobacteria | MZ575011                 | 98.92%     |
|             |                | RL7A    | <i>Rubrimonas shengliensis</i> strain SL014B-28A2      | Proteobacteria | MZ575012                 | 81.63%     |
|             |                | RL8DB   | <i>Lysobacter soli</i> strain DCY21                    | Proteobacteria | MZ575013                 | 99.60%     |
|             |                | RL9C    | Uncultured bacterium clone Luq_GN460_030               |                | MZ575014                 | 89.59%     |

|             |     |       |                                                     |                |          |        |
|-------------|-----|-------|-----------------------------------------------------|----------------|----------|--------|
|             |     | RL10A | Uncultured bacterium clone PL11D04                  |                | MZ575015 | 88.89% |
|             |     | RL10B | <i>Rhizobium</i> sp. NA11040                        | Proteobacteria | MZ575016 | 94.17% |
|             |     | RL10C | <i>Rhizobium viscosum</i> strain APP111             | Proteobacteria | MZ575017 | 94.06% |
|             |     | RL11A | <i>Rhizobium mesosinicum</i> strain CCBAU 25010     | Proteobacteria | MZ575018 | 96.32% |
|             |     | RL11B | <i>Pseudomonas monteilii</i> strain NBRC 103158     | Proteobacteria | MZ575019 | 98.87% |
|             |     | RL13B | <i>Variovorax</i> sp. strain UFLA_290               | Proteobacteria | MZ575020 | 90.48% |
|             |     | RL14A | <i>Variovorax</i> sp. strain Beta-76                | Proteobacteria | MZ575021 | 91.02% |
|             |     | RL14B | <i>Agrobacterium salinitolerans</i> strain YIC 5082 | Proteobacteria | MZ575022 | 92.16% |
|             |     | RL16A | <i>Neorhizobium galegae</i> strain NBRC 14965       | Proteobacteria | MZ575023 | 91.21% |
|             |     | RL17  | <i>Ensifer adhaerens</i> strain NBRC 100388         | Proteobacteria | MZ575024 | 83.69% |
|             |     | RL19B | <i>Variovorax defluvi</i> strain 2C1-b              | Proteobacteria | MZ575025 | 77.03% |
|             |     | RL20  | <i>Agrobacterium rhizogenes</i> strain IFO 13257    | Proteobacteria | MZ575026 | 77.85% |
| High        |     | RH5A  | <i>Rhizobium kunmingense</i> strain LXD30           | Proteobacteria | MZ575027 | 87.10% |
|             |     | RH5B  | <i>Lactobacillus reuteri</i> strain NBRC 15892      | Firmicutes     | MZ575028 | 89.03% |
|             |     | RH6A  | <i>Agrobacterium fabrum</i> strain C58              | Proteobacteria | MZ575029 | 87.23% |
|             |     | RH8A  | <i>Lactobacillus reuteri</i> strain K100            | Firmicutes     | MZ575030 | 89.66% |
|             |     | RH9A  | <i>Mesorhizobium</i> sp. OA245                      | Proteobacteria | MZ575031 | 96.27% |
|             |     | RH11A | <i>Rhizobium pusense</i> strain NRCPB10             | Proteobacteria | MZ575032 | 99.02% |
|             |     | RH12A | <i>Agrobacterium salinitolerans</i> strain YIC 5082 | Proteobacteria | MZ575033 | 79.91% |
|             |     | RH13A | <i>Mesorhizobium</i> sp. OA245                      | Proteobacteria | MZ575034 | 93.22% |
|             |     | RH14A | <i>Ensifer adhaerens</i> strain NBRC 100388         | Proteobacteria | MZ575035 | 90.34% |
|             |     | RH18A | <i>Ensifer adhaerens</i> strain P55                 | Proteobacteria | MZ575036 | 84.37% |
|             |     |       |                                                     |                |          |        |
| Oxi – soils | Low | OL1A  | <i>Pseudomonas</i> sp. P108                         | Proteobacteria | MZ574985 | 97.37% |
|             |     | OL1B  | Bacterium strain TS-3-27                            |                | MZ574986 | 79.92% |



|      |       |                                                      |                |          |        |
|------|-------|------------------------------------------------------|----------------|----------|--------|
|      | OL2A  | <i>Rhizobium</i> sp. strain YE2-4                    | Proteobacteria | MZ574987 | 98.15% |
|      | OL2B  | <i>Stenotrophomonas maltophilia</i> strain TCCC11216 | Proteobacteria | MZ574988 | 97.60% |
|      | OL2C  | <i>Stenotrophomonas maltophilia</i> strain SCS1.1    | Proteobacteria | MZ574989 | 96.21% |
|      | OL3C  | Uncultured bacterium clone JSP_109 16S               |                | MZ574990 | 96.30% |
|      | OL4   | <i>Pseudomonas nitritireducens</i> strain NRB021     | Proteobacteria | MZ574991 | 87.80% |
|      | OL5A  | <i>Agrobacterium tumefaciens</i> strain UHFBA-215    | Proteobacteria | MZ574992 | 90.85% |
|      | OL6A  | <i>Rhizobium</i> sp. strain BR13542                  | Proteobacteria | MZ574993 | 95.58% |
|      | OL7A  | <i>Stenotrophomonas</i> sp. strain EMP41             | Proteobacteria | MZ574994 | 97.55% |
|      | OL10A | <i>Stenotrophomonas maltophilia</i> strain BGS15     | Proteobacteria | MZ574995 | 80.88% |
|      | OL12A | <i>Stenotrophomonas maltophilia</i>                  | Proteobacteria | MZ574996 | 98.36% |
|      | OL13A | Uncultured <i>Stenotrophomonas</i> sp.               |                | MZ574997 | 94.57% |
|      | OL14A | <i>Stenotrophomonas maltophilia</i> strain Sea-8     | Proteobacteria | MZ574998 | 97.33% |
|      | OL15A | <i>Stenotrophomonas maltophilia</i> strain ER39      | Proteobacteria | MZ574999 | 97.99% |
|      | OL16  | <i>Stenotrophomonas</i> sp. strain JDMARP21          | Proteobacteria | MZ575000 | 98.80% |
| High | OH3BB | Uncultured bacterium clone JSP_70                    |                | MZ575001 | 92.86% |
|      | OH3BC | <i>Rhizobium</i> sp. KT24                            | Proteobacteria | MZ575002 | 98.53% |
|      | OH7A  | <i>Stenotrophomonas maltophilia</i>                  | Proteobacteria | MZ575003 | 98.46% |
|      | OH9A  | Bacterium strain BS1778                              |                | MZ575004 | 95.57% |
|      | OH10A | <i>Agrobacterium</i> sp. strain A19T2-60D-R-025 R    | Proteobacteria | MZ575005 | 97.86% |
|      | OH11A | <i>Mesorhizobium</i> sp. OA245                       | Proteobacteria | MZ575006 | 96.27% |
|      | OH12A | <i>Agrobacterium</i> sp. strain NAE168               | Proteobacteria | MZ575007 | 94.95% |
